# Supplementary material
Source: PubMed Central journal article supplement (PMC4788086)
Supplement: helc798710.ww3_default.pdf [file helc798710.ww3_default.pdf]

**Appendix 3:** Supplementary tables [posted as supplied by author]

**Table A** Work status at baseline and 2 year follow-up.

| <b>Work status baseline/2-year follow-up</b>             | <b>No (%) allocated to surgery</b> | <b>No (%) allocated to rehabilitation</b> | <b>P value*</b> |
|----------------------------------------------------------|------------------------------------|-------------------------------------------|-----------------|
| Work/work                                                | 13 (18.4)                          | 9 (14.1)                                  | 0.41            |
| Work/not work                                            | 1 (1.5)                            | 2 (3.1)                                   | 0.53            |
| Not work/Work                                            | 20 (29.9)                          | 18 (28.1)                                 | 0.83            |
| Not work/Not work                                        | 22 (32.8)                          | 25 (39.1)                                 | 0.46            |
| Part time work/Full time work or Not work/Part time work | 8 (11.9)                           | 4 (6.2)                                   | 0.26            |
| Full time work/Part time work or Part time work/Not work | 3 (4.5)                            | 6 (9.4)                                   | 0.27            |
| Total                                                    | 67 (100)                           | 64 (100)                                  |                 |
| Net back to work†                                        | 21 (31.3)                          | 15 (23.4)                                 | 0.31            |

\*Chi-square test.

†Patients who stopped working were subtracted from those who went back to work. Back to part-time working from not working was considered half back to work and vice-versa. Homemakers ( $n=1$ ), students ( $n=6$ ), patients lost to follow-up ( $n=31$ ), the unemployed ( $n=2$ ), and patients for whom data were missing ( $n=2$ ) were excluded while patients with disability pension were included in the analysis. Data were collected from patients and from the Norwegian national insurance of employees. Patients who crossed over to the other treatment were considered in their initial group and included in the analysis.

**Table B** Patients lost to follow-up after randomization.

| Randomized treatment | Received treatment                          | ODI      |            | Back pain at follow-up* | Work at follow-up*                           | Timing of withdrawal |
|----------------------|---------------------------------------------|----------|------------|-------------------------|----------------------------------------------|----------------------|
|                      |                                             | Baseline | Follow-up* |                         |                                              |                      |
| Rehabilitation       | Surgery: disc prosthesis                    | 68       | 34         | 30                      | Rehabilitation                               | Before treatment     |
| Rehabilitation       | Surgery for disc herniation                 | 44       | 32         | 57                      | 50% work                                     | After treatment      |
| Rehabilitation       | Surgery: disc prosthesis                    | 28       | 2          | 1                       | Work                                         | Before treatment     |
| Rehabilitation       | Surgery: disc prosthesis                    | 42       | 14         | 3                       | Rehabilitation                               | During treatment     |
| Rehabilitation       | Surgery for disc herniation                 | 46       | 60         | 82                      | Rehabilitation                               | During treatment     |
| Surgery              | Surgery: with x-stop                        | 33       | 50         | 85                      | 80% sick leave                               | Before treatment     |
| Rehabilitation†      | Rehabilitation                              | 30       |            |                         | ?                                            | After treatment      |
| Surgery              | No treatment                                | 42       | 32         | 80                      | Work                                         | Before treatment     |
| Surgery              | Rehabilitation                              | 40       | 24         | 56                      | Work                                         | Before treatment     |
| Rehabilitation       | Rehabilitation                              | 30       | 32         | 57                      | Rehabilitation                               | After treatment      |
| Surgery              | Surgery: disc prosthesis and leg amputation | 42       | 32         | 0                       | ?                                            | After treatment      |
| Rehabilitation       | No treatment                                | 30       | 54         | 82                      | Rehabilitation                               | During treatment     |
| Surgery              | Surgery: twice for disc herniation          | 34       | 40         | 71                      | Work                                         | Before treatment     |
| Rehabilitation       | Surgery: fusion                             | 32       | 10         | 18                      | Work                                         | Before treatment     |
| Surgery              | Surg. disc prosthesis                       | 60       | 0          | 0                       | Work                                         | After treatment      |
| Surgery              | No treatment                                | 50       | 36         | 92                      | Disability pension                           | Before treatment     |
| Rehabilitation†      | Rehabilitation                              | 34       |            |                         | Died of cancer                               | After treatment      |
| Rehabilitation       | Rehabilitation                              | 56       | 44         | 56                      | Work                                         | After treatment      |
| Surgery†             | No treatment                                | 32       |            |                         | Rehabilitation                               | Before treatment     |
| Surgery†             | Surgery: disc prosthesis                    | 35       |            |                         | ?                                            | After treatment      |
| Surgery              | No treatment                                | 32       | 34         | 51                      | Disability pension                           | Before treatment     |
| Rehabilitation       | No treatment                                | 50       | 34         | 93                      | 50% rehabilitation<br>50% disability pension | Before treatment     |
| Rehabilitation       | No treatment                                | 44       | 24         | 58                      | Work                                         | During treatment     |
| Rehabilitation       | No treatment                                | 62       | 60         | 85                      | Work                                         | During treatment     |
| Rehabilitation       | Surgery: disc prosthesis                    | 60       | 28         | 9                       | Work                                         | Before treatment     |
| Rehabilitation       | Surgery: disc prosthesis                    | 48       | 22         | 26                      | 50% work                                     | Before treatment     |

|                 |                          |    |    |    |                    |                  |
|-----------------|--------------------------|----|----|----|--------------------|------------------|
| Rehabilitation† | Rehabilitation           | 44 |    |    | Disability pension | After treatment  |
| Surgery         | Surgery: disc prosthesis | 34 | 0  | 0  | Work               | After treatment  |
| Rehabilitation  | Rehabilitation           | 36 | 16 | 24 | Work               | After treatment  |
| Surgery†        | ?                        | 34 |    |    | ?                  | Before treatment |
| Rehabilitation† | Rehabilitation           | 50 |    |    | ?                  | After treatment  |
| Surgery         | Rehabilitation           | 40 | 36 | 68 | Rehabilitation     | Before treatment |
| Rehabilitation  | No treatment             | 69 | 57 | 60 | Sick leave         | Before treatment |

Values given are means.

\*Follow-up ranged from 2.5 years to 5 years. 29 of 34 patients received a questionnaire (1 patient died of cancer, 4 patients refused participation), 26 responded.

†Did not answer the questionnaire or refused participation.

ODI = Oswestry Disability Index.
